# Supplementary material
Source: Springer Nature journal article supplement (https://www.springermedizin.de/resource/supplementary/12889_2011_2804_MOESM1_ESM.pdf/9490008)
Supplement: MOESM1 [file 9490008]

## Intensive Phase

### Months 0-6

- 9 group case management sessions
- 2 personal case management sessions
- 3 home visit sessions

### Months 7-12

- 3 group case management sessions
- 1 personal case management session
- 2 home visit sessions

## Maintenance Phase

### Months 13-18

- 2 group case management sessions
- 1 personal case management session
- 1 home visit session

### Months 19-24

- 1 group case management session
- 1 home visit session

Baseline data visit

6-month data visit

12-month data visit

18-month data visit

24-month data visit
